# Supplementary material
Source: publisher figshare collection journal article supplement (https://acs.figshare.com/ndownloader/files/9754534)

Supporting Information for

## **Formation of Nitrogen-Containing Organic Aerosol during Combustion of High Sulfur Content Coal**

Xiaofei Wang<sup>1</sup>, Hanliu Wang<sup>2</sup>, He Jing<sup>1</sup>, Wei-Ning Wang<sup>1</sup>, Wendong Cui<sup>2</sup>, Brent J. Williams<sup>1</sup>,  
and Pratim Biswas<sup>1\*</sup>

[1] Department of Energy, Environmental and Chemical Engineering

Washington University in St. Louis

St. Louis, MO 63130, U.S.A.

[2] Department of Chemistry

Washington University in St. Louis

St. Louis, MO 63130, U.S.A.

\*To whom correspondence should be addressed.

Correspondence to: Pratim Biswas

Email: [pbiswas@wustl.edu](mailto:pbiswas@wustl.edu),

Tel: 1-314-935-5548, Fax: 1-314-935-5464

## Detailed Procedures of Operating HPLC

10  $\mu\text{L}$  sample in methanol was dissolved in 90  $\mu\text{L}$   $\text{H}_2\text{O}$  and injected onto Phenomene RP C18 column (150\*2.00 mm, 4 micron) manually. The sample was then eluted and separated from this column via an Agilent 1200 HPLC (Santa Clara, CA) with a gradient operated at 200  $\mu\text{L}/\text{min}$  flow rate, and injected into a Maxis (Bruker, Bremen, Germany) quadrupole time-of-flight (QTOF) mass spectrometer via ESI. The following settings was used for the ESI-UHR-TOFMS: capillary voltage was 3.8 kV; pressure of nebulizer gas was 1.0 bar; drying gas flow rate and temperature were 8.0 L/min and 200  $^{\circ}\text{C}$ , respectively. The following settings were used for the HPLC: Solvent A was water containing 0.1% formic acid, and solvent B was 80% acetonitrile, 20% water containing 0.1% formic acid. The gradient settings were 2–15% solvent B in 15 min, 15–20% solvent B in 10 min, 20–25% solvent B in 10 min, 25–50% solvent B in 10 min, 50–80% solvent B in 15 min, 80–90% solvent B in 5 min, and isocratic flow at 100% solvent B for 2 min and then returned to 2% solvent B in 13 min.

## Supplementary Table and Figures

Table S1. Identified Organic Compounds of the Methanol Extract from Submicrometer Particles Collected from the Combustion of PRB Coal Mixing with 4% Elemental Sulfur (by HPLC/ESI(+)/UHR-TOFMS, the total ion chromatographs for this sample and its corresponding filter blank are shown in Fig. S5)

| Retention Time<br>(min) | Major Peaks<br>(m/z) | Calculated Ion<br>Formula                                      | Exact Mass of<br>Calculated Formula | Error<br>(ppm) |
|-------------------------|----------------------|----------------------------------------------------------------|-------------------------------------|----------------|
| 1.1                     | 110.0089             | C <sub>2</sub> H <sub>3</sub> N <sub>2</sub> O <sub>2</sub> Na | 110.00922                           | 2.927          |
| 44.8                    | 156.1022             | C <sub>8</sub> H <sub>14</sub> NO <sub>2</sub>                 | 156.10245                           | 1.625          |
|                         | 188.1285             | C <sub>9</sub> H <sub>18</sub> NO <sub>3</sub>                 | 188.12867                           | 0.895          |
|                         | 210.1105             | C <sub>9</sub> H <sub>17</sub> NO <sub>3</sub> Na              | 210.11061                           | 0.528          |
| 47.6                    | 170.1180             | C <sub>9</sub> H <sub>16</sub> NO <sub>2</sub>                 | 170.11810                           | 0.61           |
|                         | 202.1444             | C <sub>10</sub> H <sub>20</sub> NO <sub>3</sub>                | 202.14432                           | 0.403          |
|                         | 224.1262             | C <sub>10</sub> H <sub>19</sub> NO <sub>3</sub> Na             | 224.12626                           | 0.282          |
| 49.6                    | 184.1335             | C <sub>10</sub> H <sub>18</sub> NO <sub>2</sub>                | 184.13375                           | 1.378          |
|                         | 216.1598             | C <sub>11</sub> H <sub>22</sub> NO <sub>3</sub>                | 216.15997                           | 0.78           |
|                         | 238.1417             | C <sub>11</sub> H <sub>21</sub> NO <sub>3</sub> Na             | 238.14191                           | 0.895          |
| 50.9                    | 230.1753             | C <sub>12</sub> H <sub>24</sub> NO <sub>3</sub>                | 230.17562                           | 1.384          |
|                         | 296.2586             | C <sub>18</sub> H <sub>34</sub> NO <sub>2</sub>                | 296.25895                           | 1.196          |
| 51.2                    | 296.2588             | C <sub>18</sub> H <sub>34</sub> NO <sub>2</sub>                | 296.25895                           | 0.521          |
| 53.8                    | 298.2744             | C <sub>18</sub> H <sub>36</sub> NO <sub>2</sub>                | 298.27460                           | 0.685          |
|                         | 316.2852             | C <sub>18</sub> H <sub>38</sub> NO <sub>3</sub>                | 316.28517                           | 0.098          |

|      |          |                                                    |           |       |
|------|----------|----------------------------------------------------|-----------|-------|
| 54.1 | 284.2379 | C <sub>20</sub> H <sub>30</sub> N                  | 284.23782 | 0.264 |
| 54.4 | 310.2385 | C <sub>18</sub> H <sub>32</sub> NO <sub>3</sub>    | 310.23822 | 0.584 |
| 54.8 | 310.2384 | C <sub>18</sub> H <sub>32</sub> NO <sub>3</sub>    | 310.23822 | 0.906 |
| 55.5 | 380.3321 | C <sub>27</sub> H <sub>42</sub> N                  | 380.33173 | 0.985 |
| 56.3 | 280.2643 | C <sub>18</sub> H <sub>34</sub> NO                 | 280.26404 | 0.929 |
| 56.9 | 280.2641 | C <sub>18</sub> H <sub>34</sub> NO                 | 280.26404 | 0.215 |
| 57.1 | 280.2641 | C <sub>18</sub> H <sub>34</sub> NO                 | 280.26404 | 0.215 |
| 57.3 | 280.2640 | C <sub>18</sub> H <sub>34</sub> NO                 | 280.26404 | 0.142 |
|      | 296.2589 | C <sub>18</sub> H <sub>34</sub> NO <sub>2</sub>    | 296.25895 | 0.183 |
|      | 328.2851 | C <sub>19</sub> H <sub>38</sub> NO <sub>3</sub>    | 328.28517 | 0.21  |
|      | 350.2671 | C <sub>19</sub> H <sub>37</sub> NO <sub>3</sub> Na | 350.26711 | 0.039 |

Figure S1. Elemental ratios for fine organic particulate matter from combustion of ILL#6 coal, a high sulfur content coal.

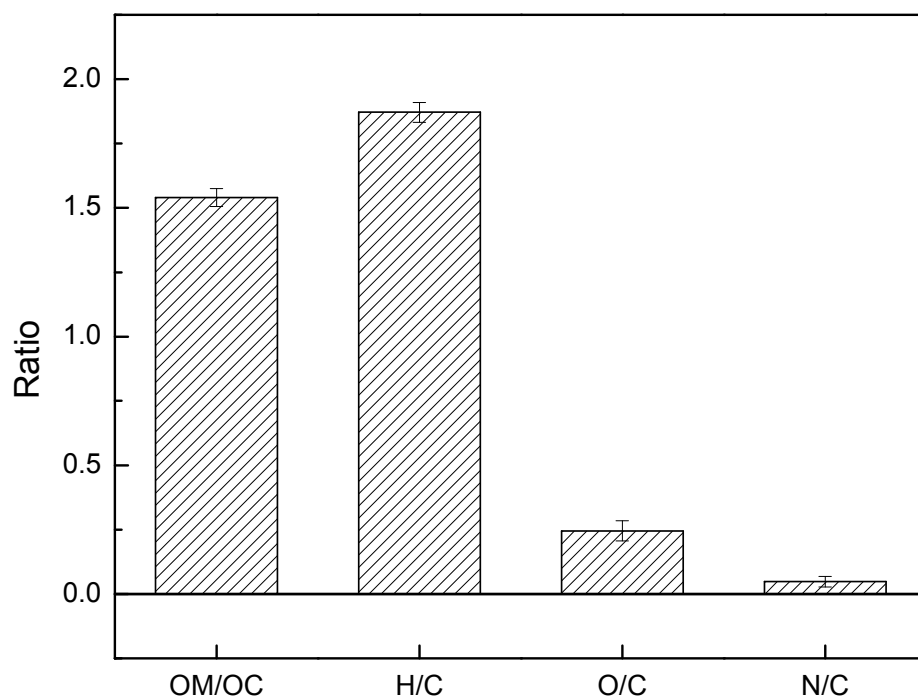

Figure S2. High resolution organic AMS spectrum of submicrometer particles from the combustion of PRB coals mixing with 4% sulfur

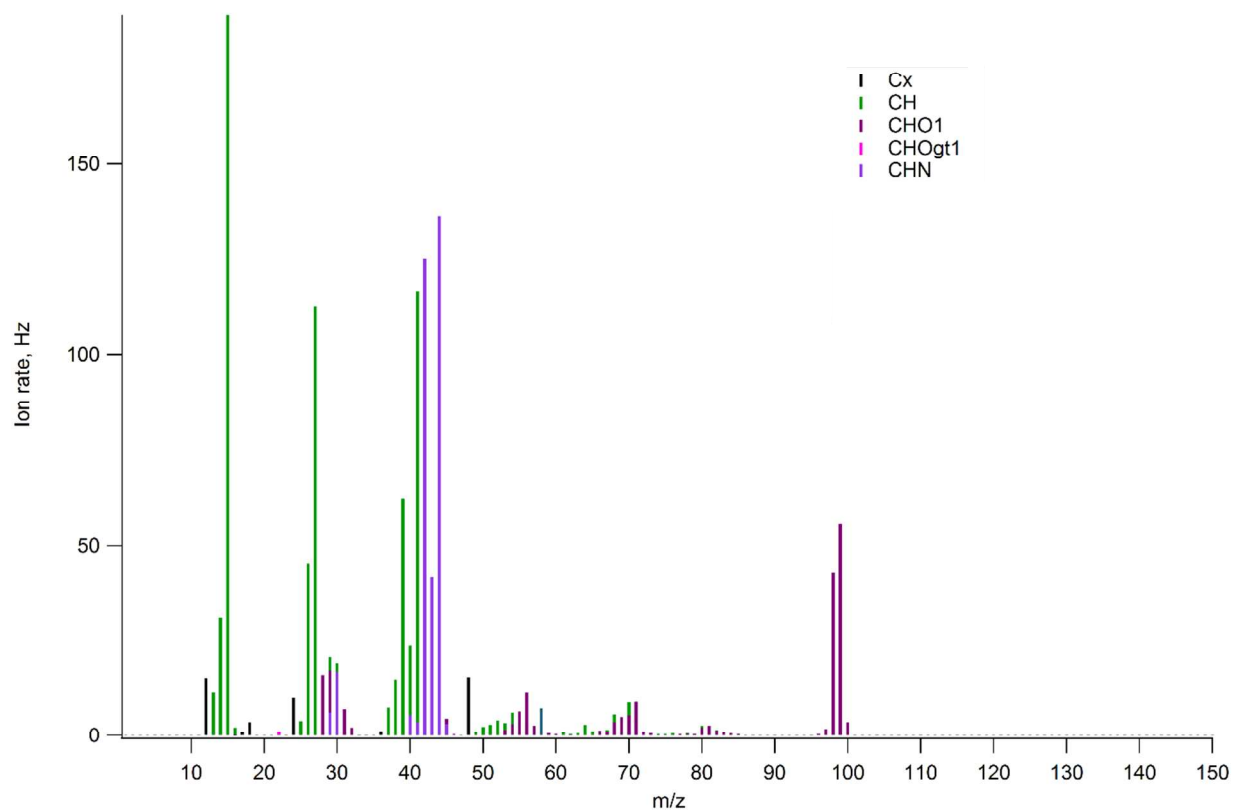

Figure S3. (A) Calculated particle mass concentrations; (B) elemental compositions; and (C) correlation of concentration between sulfur (determined by XRF) and organic matter of submicrometer particles from the combustion of PRB coals mixing with different content of sulfur (Combustion condition: temperature: 1376 K, air flow rate: 3 LPM, fuel-air equivalence ratio: 0.083)

(A)

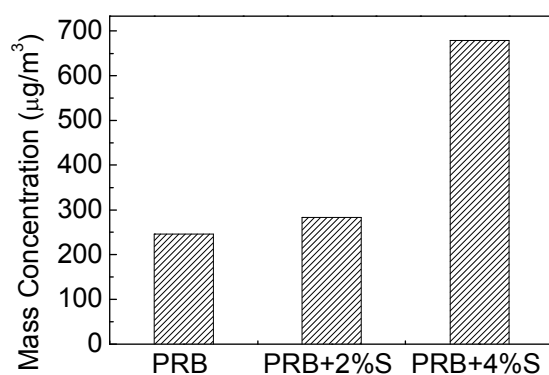

(B)

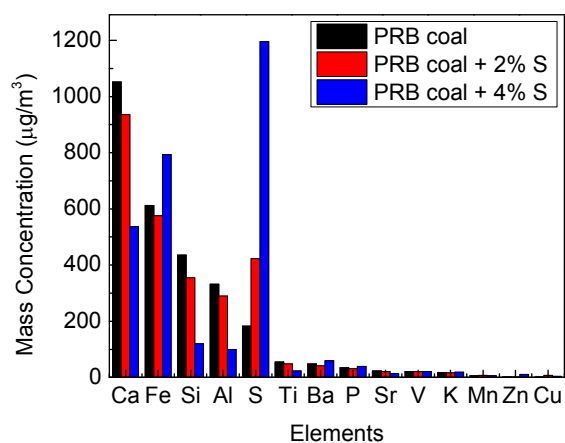

(C)

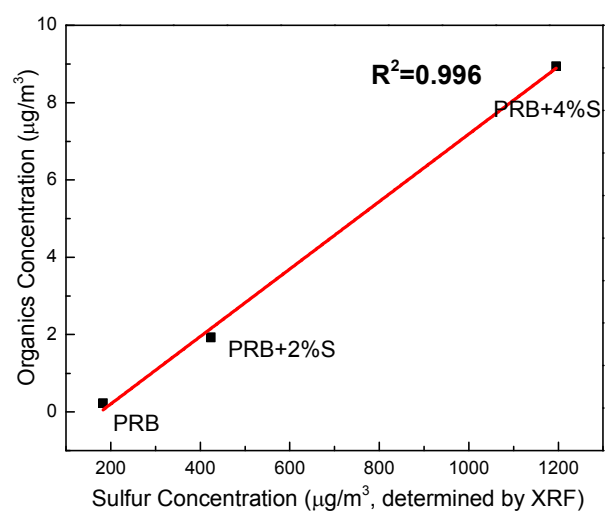



Figure S4. Total ion chromatography (LC-ESI(+)-TOFMS) of the methanol extract from (1) submicrometer particles collected from the combustion of PRB coals mixing with 4% sulfur; and (2) filter blank

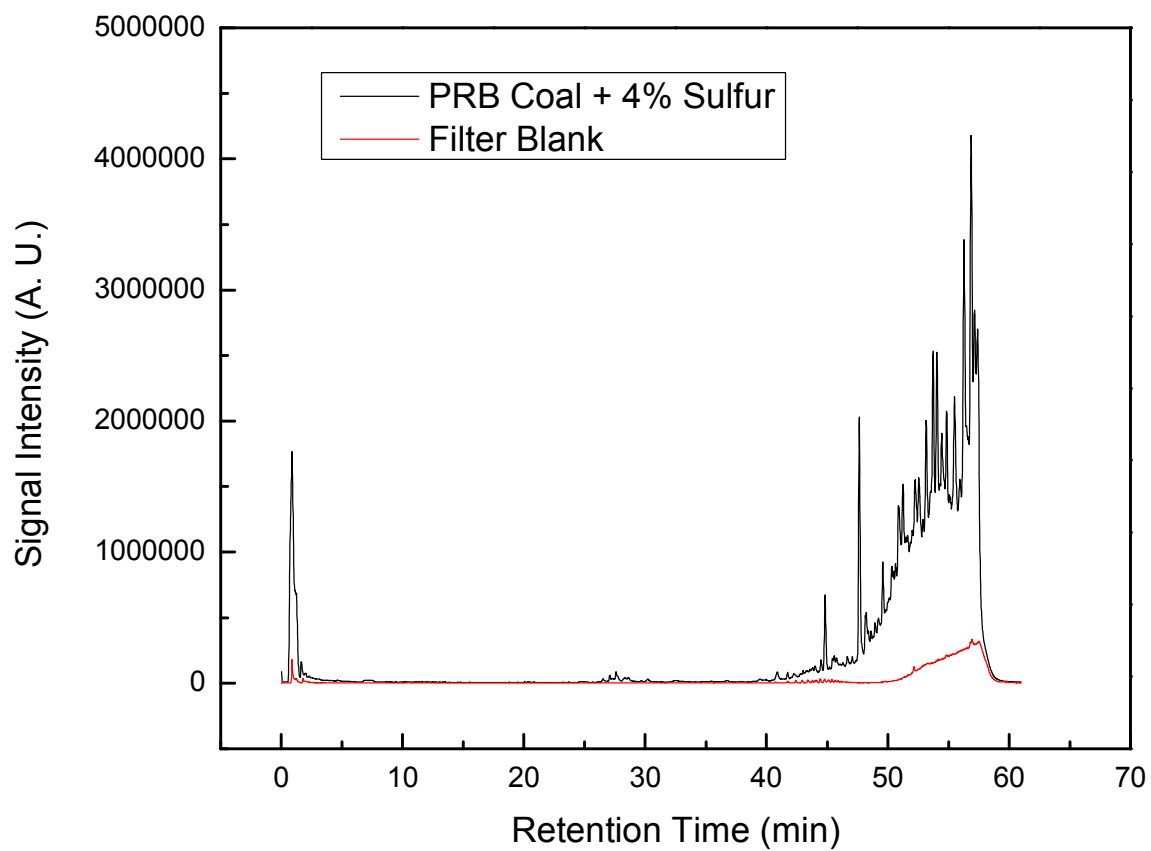

Supplement: Supplementary file 1 [file 9754534]
